# Supplementary material
Source: PubMed Central journal article supplement (PMC5927830)
Supplement: NIHMS935739-supplement-supplement_1.pdf [file NIHMS935739-supplement-supplement_1.pdf]

## Osteoarthritis

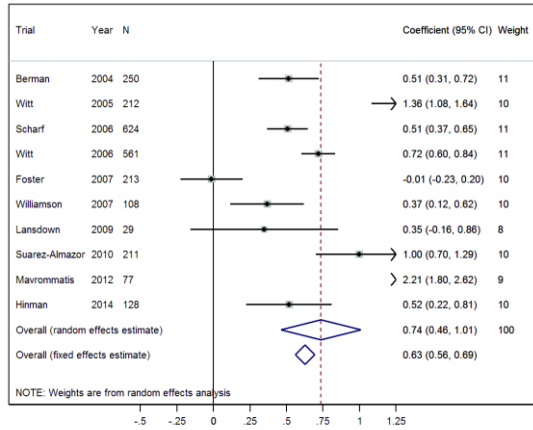

## Headache

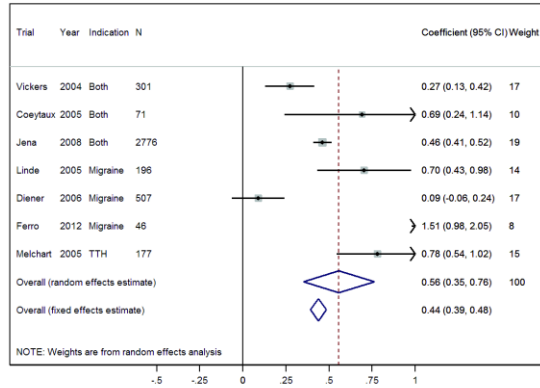

## Musculoskeletal Pain

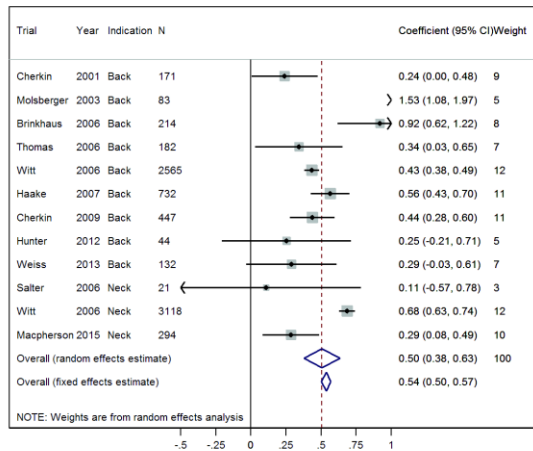

Figure S1 No Acupuncture Control RE.eps

### Osteoarthritis

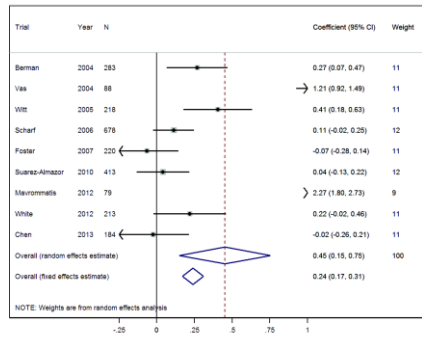

### Headache

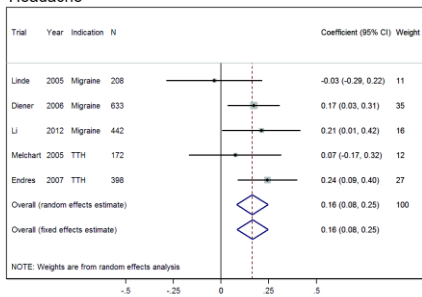

### Musculoskeletal Pain

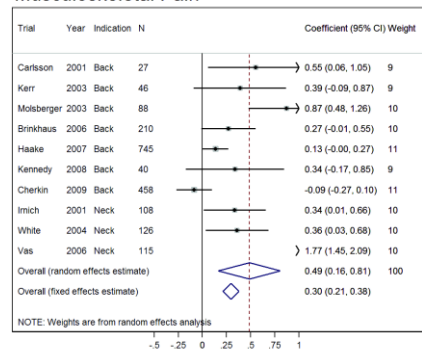

### Specific Shoulder Pain

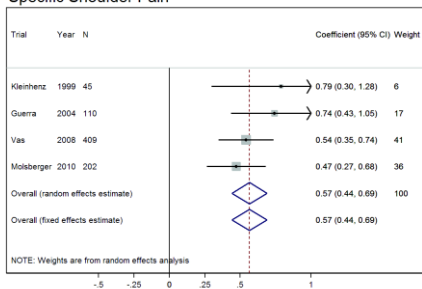

Figure S2 Sham Control RE.eps
